# Supplementary material
Source: PubMed Central journal article supplement (PMC4592417)
Supplement: NIHMS704756-supplement-TableS1.pdf [file NIHMS704756-supplement-TableS1.pdf]

Supplementary Table 1. Characteristics of 26 patients in study.

| Characteristic                                  | Number     | Percentage (%) |
|-------------------------------------------------|------------|----------------|
| Age (years)                                     |            |                |
| Median (range)                                  | 59 (22-75) |                |
| Sex                                             |            |                |
| Female                                          | 15         | (58)           |
| Male                                            | 11         | (42)           |
| Disease types (initial diagnosis)               |            |                |
| Pancreatic Ductal Adenocarcinoma                | 18         | (69)           |
| Biliary                                         | 8          | (31)           |
| Pathologic stage                                |            |                |
| III                                             | 3          | (12)           |
| IV                                              | 23         | (88)           |
| Number of metastatic sites                      |            |                |
| 0                                               | 3          | (12)           |
| 1                                               | 16         | (62)           |
| 2 or more                                       | 7          | (27)           |
| Tumor sample origin                             |            |                |
| Primary                                         | 11         | (42)           |
| Metastasis                                      | 15         | (58)           |
| Tumor source                                    |            |                |
| Biopsy                                          | 23         | (88)           |
| Tumor Bulk Tissue                               | 3          | (12)           |
| Number of blood draws per patient               |            |                |
| 1                                               | 14         | (54)           |
| 2                                               | 5          | (19)           |
| 3                                               | 3          | (12)           |
| >3                                              | 4          | (15)           |
| Time between biopsy and blood sample collection |            |                |
| 0-10 days                                       |            |                |
| 11-20 days                                      | 6          | (23)           |
| >20 days                                        | 9          | (35)           |
|                                                 | 11         | (42)           |
