# Supplementary material
Source: PubMed Central journal article supplement (PMC4592417)

A

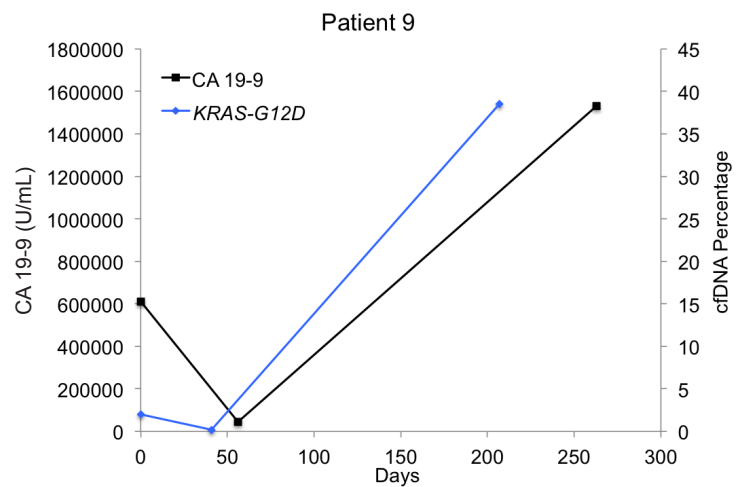

D

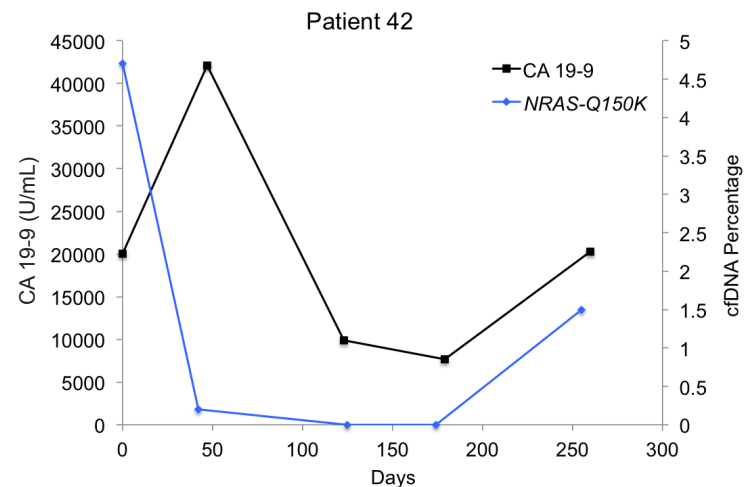

B

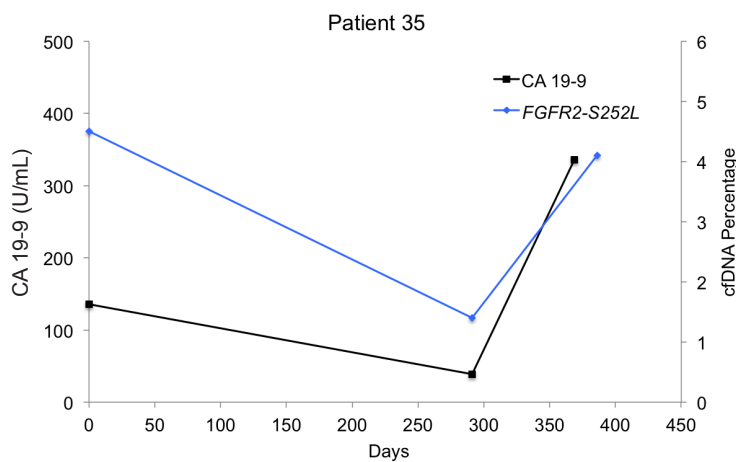

E

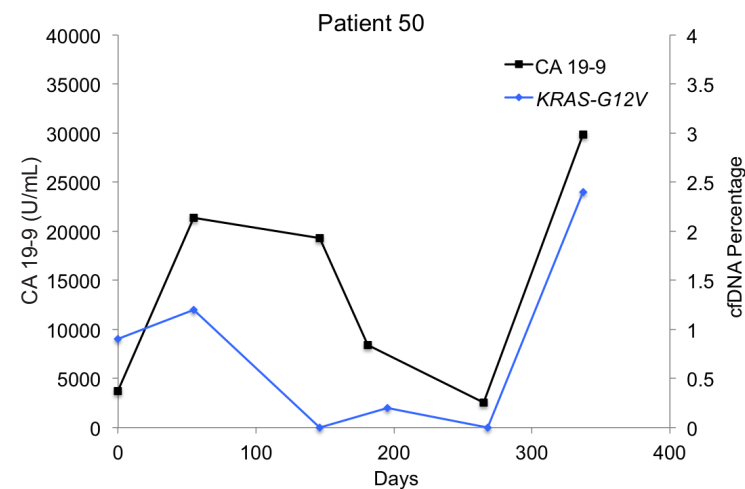

C

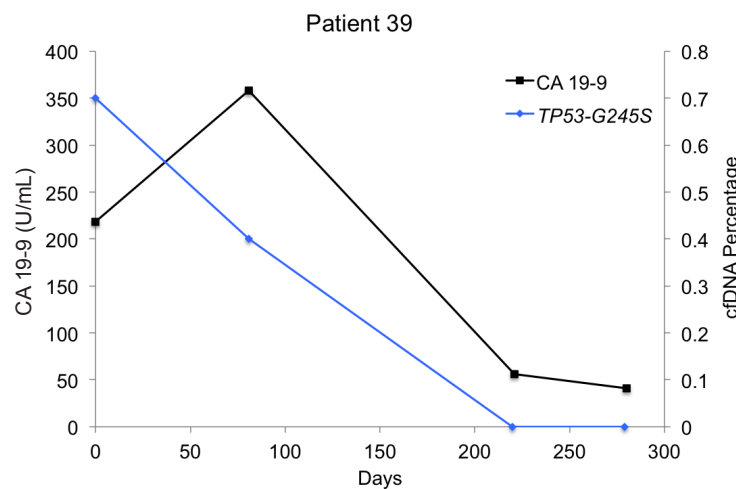

F

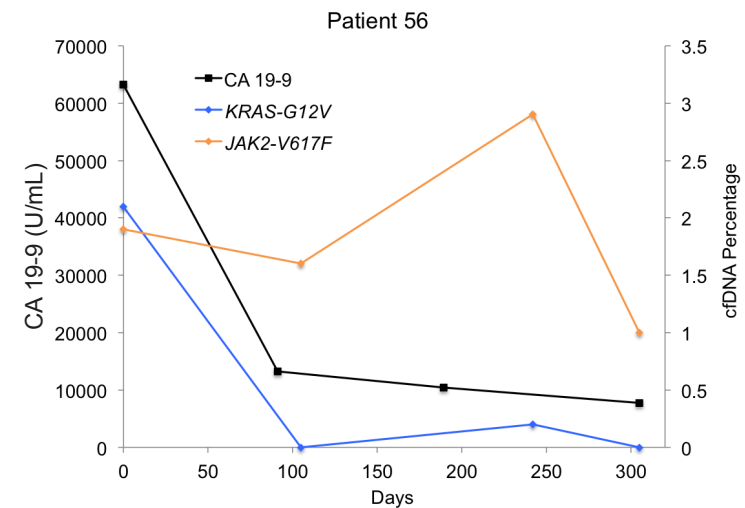

Supplement: NIHMS704756-supplement-FigS1.pdf [file NIHMS704756-supplement-FigS1.pdf]
